# Supplementary material
Source: PubMed Central journal article supplement (PMC8455041)
Supplement: CJN.18021120SupplementaryData.pdf [file CJN.18021120SupplementaryData.pdf]

## Supplemental Material

Supplemental Table 1. List of hazard ratios of HLA alleles in Cox proportional hazards models to assess associations between HLA alleles and kidney outcome event ( $\geq 40\%$  eGFR decline during follow-up) in patients with PLA2R-related membranous nephropathy.

Supplemental Table 2. The carrying rate of HLA alleles in patients and healthy controls in this study. More information would be found in previous publications [J Am Soc Nephrol. 2016;27(10): 3195-3203.].

Supplemental Table 3. Risk factors for assessing risk of  $\geq 50\%$  eGFR decline in patients with PLA2R2-related Membranous Nephropathy (n = 392).

Supplemental Table 4. Relationship between the susceptible alleles and the four identified progressive risk alleles.

Supplemental Figure 1. Kaplan–Meier analysis of kidney survival curves ( $\geq 50\%$  decline in eGFR) in PLA2R-related membranous nephropathy patients. HLA risk alleles: DRB1\*13:01, DQB1\*06:03, DRB1\*04:05 or DQB1\*03:02.

Supplemental Figure 2. Kaplan–Meier analysis of kidney survival curves ( $\geq 40\%$  decline in eGFR) in PLA2R-related membranous nephropathy patients. (A) Patients with positive HLA DRB1\*13:01 had worse kidney outcome than those with negative HLA DRB1\*13:01 during follow-up. (B) Patients with DRB1\*13:01<sup>+</sup>DRB3\*02:02<sup>+</sup> had a significant higher rate of kidney failure than those with DRB1\*13:01<sup>-</sup>DRB3\*02:02<sup>+</sup>.

Supplemental Figure 3. Kaplan–Meier analysis of kidney survival curves ( $\geq 40\%$  decline in eGFR) in PLA2R-related membranous nephropathy patients. Patients with positive HLA DRB1\*04:05 had worse kidney outcomes during follow-up. eGFR, estimated glomerular filtration.

Supplemental Figure 4. Kaplan–Meier analysis of kidney survival curves ( $\geq 40\%$  decline in eGFR) in PLA2R-related membranous nephropathy patients. Patients with positive HLA DQB1\*03:02 had worse kidney outcomes during follow-up. eGFR, estimated glomerular filtration.

Supplemental Figure 5. Linkage map of HLA-DRB3/4/5 with HLA-DRB1 in the National Marrow Donor Program (NMDP) of Chinese population.

Supplemental Table 1. List of hazard ratios of HLA alleles in Cox proportional hazards models to assess associations between HLA alleles and kidney outcome event ( $\geq 40\%$  eGFR decline during follow-up) in patients with PLA2R-related membranous nephropathy.

|    | allele name | HR   | Lower95 | Upper95 | P-value     |
|----|-------------|------|---------|---------|-------------|
| 1  | DRB1*13:01  | 3.71 | 1.77    | 7.80    | 0.000533757 |
| 2  | DQB1*06:03  | 3.71 | 1.77    | 7.80    | 0.000533757 |
| 3  | DRB1*04:05  | 3.80 | 1.52    | 9.50    | 0.004281035 |
| 4  | DQB1*03:02  | 3.06 | 1.40    | 6.72    | 0.005238834 |
| 5  | DQA1*01:03  | 2.14 | 1.19    | 3.87    | 0.011502572 |
| 6  | DQA1*03:03  | 2.94 | 1.26    | 6.83    | 0.012265818 |
| 7  | DQB1*04:01  | 2.91 | 1.16    | 7.27    | 0.022356019 |
| 8  | DQA1*03:01  | 2.41 | 1.04    | 5.58    | 0.040849005 |
| 9  | DRB1*01:01  | 4.07 | 0.99    | 16.68   | 0.051568479 |
| 10 | DQB1*NEW    | 7.04 | 0.97    | 51.25   | 0.054057101 |
| 11 | DQB1*05:01  | 2.69 | 0.98    | 7.42    | 0.055859951 |
| 12 | DRB1*04:06  | 3.09 | 0.97    | 9.88    | 0.056905942 |
| 13 | DRB5*01:01  | 0.62 | 0.37    | 1.03    | 0.062510271 |
| 14 | DQA1*01:02  | 0.64 | 0.39    | 1.07    | 0.087053781 |
| 15 | DRB1*15:01  | 0.65 | 0.39    | 1.07    | 0.090301761 |
| 16 | DQB1*05:02  | 0.19 | 0.03    | 1.40    | 0.103833444 |
| 17 | DQB1*02:02  | 0.33 | 0.08    | 1.33    | 0.118412983 |
| 18 | DQB1*03:01  | 0.59 | 0.30    | 1.15    | 0.119947467 |
| 19 | DRB1*04:03  | 2.95 | 0.72    | 12.06   | 0.133138663 |
| 20 | DRB1*07:01  | 0.52 | 0.19    | 1.43    | 0.203051095 |
| 21 | DQA1*01:05  | 2.48 | 0.60    | 10.25   | 0.20816465  |
| 22 | DRB1*10:01  | 2.48 | 0.60    | 10.25   | 0.20816465  |
| 23 | DQA1*02:01  | 0.52 | 0.19    | 1.44    | 0.211171188 |
| 24 | DQB1*06:41  | 3.46 | 0.48    | 25.08   | 0.218599473 |
| 25 | DQA1*01:04  | 0.59 | 0.25    | 1.37    | 0.218680717 |
| 26 | DQA1*01:01  | 2.04 | 0.50    | 8.35    | 0.321723626 |
| 27 | DQB1*06:02  | 0.79 | 0.48    | 1.28    | 0.336109714 |
| 28 | DRB1*08:03  | 1.54 | 0.62    | 3.84    | 0.351222694 |

|    |            |      |      |       |             |
|----|------------|------|------|-------|-------------|
| 29 | DRB1*12:10 | 2.48 | 0.34 | 17.90 | 0.368157969 |
| 30 | DQA1*05:05 | 0.72 | 0.33 | 1.57  | 0.403801619 |
| 31 | DRB1*08:09 | 2.31 | 0.32 | 16.76 | 0.407142644 |
| 32 | DQB1*06:01 | 0.77 | 0.41 | 1.44  | 0.415070046 |
| 33 | DRB1*14:05 | 0.70 | 0.25 | 1.92  | 0.487563594 |
| 34 | DRB3*01:01 | 1.49 | 0.36 | 6.09  | 0.581720231 |
| 35 | DQA1*05:01 | 1.14 | 0.68 | 1.89  | 0.620435666 |
| 36 | DQB1*05:03 | 0.85 | 0.39 | 1.86  | 0.686411822 |
| 37 | DQB1*03:03 | 1.17 | 0.54 | 2.57  | 0.689762717 |
| 38 | DRB1*13:02 | 0.75 | 0.18 | 3.08  | 0.691763891 |
| 39 | DRB3*02:02 | 1.11 | 0.65 | 1.90  | 0.701256078 |
| 40 | DRB3*03:01 | 0.84 | 0.34 | 2.09  | 0.704472408 |
| 41 | DQA1*04:01 | 1.41 | 0.20 | 10.22 | 0.730774431 |
| 42 | DQB1*04:02 | 1.41 | 0.20 | 10.22 | 0.730774431 |
| 43 | DQB1*02:01 | 1.07 | 0.65 | 1.78  | 0.786371147 |
| 44 | DRB1*03:01 | 1.07 | 0.65 | 1.78  | 0.786371147 |
| 45 | DRB1*11:01 | 0.91 | 0.42 | 2.00  | 0.817074574 |
| 46 | DRB1*12:01 | 0.79 | 0.11 | 5.72  | 0.817363959 |
| 47 | DQA1*06:01 | 1.11 | 0.45 | 2.76  | 0.822879491 |
| 48 | DRB1*12:02 | 1.10 | 0.44 | 2.75  | 0.830935734 |
| 49 | DQB1*06:04 | 1.21 | 0.17 | 8.75  | 0.848656946 |
| 50 | DQA1*03:02 | 1.09 | 0.44 | 2.72  | 0.850157228 |
| 51 | DRB1*09:01 | 0.92 | 0.33 | 2.54  | 0.874180266 |
| 52 | DRB1*14:04 | 1.10 | 0.15 | 7.96  | 0.922385012 |
| 53 | DRB1*15:02 | 0.00 | 0.00 | Inf   | 0.994542239 |
| 54 | DRB5*01:02 | 0.00 | 0.00 | Inf   | 0.994591966 |
| 55 | DQB1*06:09 | 0.00 | 0.00 | Inf   | 0.994706299 |
| 56 | DQA1*05:03 | 0.00 | 0.00 | Inf   | 0.994789757 |
| 57 | DRB1*12:28 | 0.00 | 0.00 | Inf   | 0.995004853 |
| 58 | DRB1*16:02 | 0.00 | 0.00 | Inf   | 0.995004853 |
| 59 | DRB1*13:12 | 0.00 | 0.00 | Inf   | 0.995236083 |
| 60 | DQB1*03:05 | 0.00 | 0.00 | Inf   | 0.995511227 |
| 61 | DRB1*04:01 | 0.00 | 0.00 | Inf   | 0.995586627 |
| 62 | DRB1*11:04 | 0.00 | 0.00 | Inf   | 0.995755597 |
| 63 | DRB1*14:14 | 0.00 | 0.00 | Inf   | 0.995756127 |
| 64 | DRB5*01:08 | 0.00 | 0.00 | Inf   | 0.995881579 |
| 65 | DRB1*04:02 | 0.00 | 0.00 | Inf   | 0.996034593 |

|    |            |      |      |      |             |
|----|------------|------|------|------|-------------|
| 66 | DQA1*NEW   | 0.00 | 0.00 | Inf  | 0.996045314 |
| 67 | DRB1*08:04 | 0.00 | 0.00 | Inf  | 0.996060511 |
| 68 | DRB1*14:03 | 0.00 | 0.00 | Inf  | 0.996090356 |
| 69 | DQA1*05:09 | 0.00 | 0.00 | Inf  | 0.996105861 |
| 70 | DRB1*11:11 | 0.00 | 0.00 | Inf  | 0.996105861 |
| 71 | DRB1*14:07 | 0.00 | 0.00 | Inf  | 0.996139592 |
| 72 | DRB1*08:02 | 0.00 | 0.00 | Inf  | 0.996194995 |
| 73 | DRB1*15:04 | 0.00 | 0.00 | Inf  | 0.996283702 |
| 74 | DRB1*11:03 | 0.00 | 0.00 | Inf  | 0.99654845  |
| 75 | DQA1*05:08 | 0.00 | 0.00 | Inf  | 0.996617549 |
| 76 | DQA1*05:06 | 0.00 | 0.00 | Inf  | 0.996671806 |
| 77 | DQB1*03:13 | 0.00 | 0.00 | Inf  | 0.996804383 |
| 78 | DRB1*14:54 | 1.00 | 0.31 | 3.19 | 0.997734601 |
| 79 | DRB1*04:04 | NA   | NA   | NA   | NA          |

DQA1\*NEW, new DQA1 allele identified by HLA target sequencing; DQB1\*NEW, new DQB1 allele identified by HLA target sequencing. NA, the result is not available in the Cox analysis for there is only one patient carrying the DRB1\*04:04. Inf, infinity.

Supplemental Table 2. The carrying rate of HLA alleles in patients and healthy controls in this study. More information would be found in previous publications [J Am Soc Nephrol. 2016;27(10): 3195-3203.].

| Alleles    | Cases<br>(N = 392) | Health Controls<br>(n=385) |
|------------|--------------------|----------------------------|
| DQA1*01:01 | 0.02               | 0.05                       |
| DQA1*01:02 | 0.73               | 0.30                       |
| DQA1*01:03 | 0.10               | 0.19                       |
| DQA1*01:04 | 0.16               | 0.09                       |
| DQA1*01:05 | 0.01               | 0.04                       |
| DQA1*02:01 | 0.09               | 0.21                       |
| DQA1*03:01 | 0.05               | 0.14                       |
| DQA1*03:02 | 0.06               | 0.28                       |
| DQA1*03:03 | 0.04               | 0.16                       |
| DQA1*04:01 | 0.01               | 0.01                       |
| DQA1*05:01 | 0.34               | 0.08                       |
| DQA1*05:03 | 0.01               | 0.00                       |
| DQA1*05:05 | 0.15               | 0.18                       |
| DQA1*05:06 | 0.01               | 0.01                       |
| DQA1*05:08 | 0.01               | 0.02                       |
| DQA1*05:09 | 0.00               | 0.00                       |
| DQA1*06:01 | 0.07               | 0.15                       |
| DQA1*NEW   | 0.01               | 0.00                       |
| DQB1*02:01 | 0.34               | 0.08                       |
| DQB1*02:02 | 0.07               | 0.18                       |
| DQB1*03:01 | 0.25               | 0.34                       |
| DQB1*03:02 | 0.05               | 0.15                       |
| DQB1*03:03 | 0.08               | 0.30                       |
| DQB1*03:05 | 0.00               | 0.01                       |
| DQB1*03:13 | 0.00               | 0.00                       |
| DQB1*04:01 | 0.03               | 0.13                       |
| DQB1*04:02 | 0.01               | 0.03                       |
| DQB1*05:01 | 0.03               | 0.09                       |
| DQB1*05:02 | 0.08               | 0.08                       |

|                   |             |             |
|-------------------|-------------|-------------|
| DQB1*05:03        | 0.14        | 0.08        |
| DQB1*06:01        | 0.22        | 0.21        |
| DQB1*06:02        | 0.51        | 0.15        |
| DQB1*06:03        | 0.03        | 0.02        |
| DQB1*06:04        | 0.02        | 0.04        |
| DQB1*06:09        | 0.02        | 0.02        |
| DQB1*06:41        | 0.00        | 0.00        |
| DQB1*NEW          | 0.00        | 0.01        |
| DRB1*01:01        | 0.01        | 0.03        |
| DRB1*01:02        | 0.00        | 0.01        |
| DRB1*03:01        | 0.34        | 0.07        |
| DRB1*04:01        | 0.01        | 0.01        |
| DRB1*04:02        | 0.01        | 0.00        |
| DRB1*04:03        | 0.01        | 0.05        |
| DRB1*04:04        | 0.00        | 0.02        |
| DRB1*04:05        | 0.03        | 0.14        |
| DRB1*04:06        | 0.02        | 0.05        |
| DRB1*04:07        | 0.00        | 0.01        |
| DRB1*04:08        | 0.00        | 0.00        |
| DRB1*04:10        | 0.00        | 0.01        |
| DRB1*07:01        | 0.09        | 0.21        |
| DRB1*08:02        | 0.01        | 0.01        |
| DRB1*08:03        | 0.05        | 0.14        |
| DRB1*08:04        | 0.00        | 0.00        |
| DRB1*08:09        | 0.01        | 0.00        |
| DRB1*09:01        | 0.06        | 0.30        |
| DRB1*10:01        | 0.01        | 0.04        |
| DRB1*11:01        | 0.12        | 0.10        |
| DRB1*11:03        | 0.00        | 0.00        |
| DRB1*11:04        | 0.02        | 0.00        |
| DRB1*11:06        | 0.00        | 0.00        |
| DRB1*11:11        | 0.00        | 0.00        |
| DRB1*12:01        | 0.02        | 0.09        |
| DRB1*12:02        | 0.07        | 0.15        |
| DRB1*12:10        | 0.01        | 0.01        |
| DRB1*12:28        | 0.00        | 0.00        |
| <b>DRB1*13:01</b> | <b>0.03</b> | <b>0.02</b> |

|             |      |      |
|-------------|------|------|
| DRB1*13:02  | 0.04 | 0.06 |
| DRB1*13:03  | 0.00 | 0.00 |
| DRB1*13:12  | 0.01 | 0.00 |
| DRB1*14:03  | 0.01 | 0.01 |
| DRB1*14:04  | 0.01 | 0.01 |
| DRB1*14:05  | 0.09 | 0.03 |
| DRB1*14:07  | 0.01 | 0.01 |
| DRB1*14:141 | 0.00 | 0.00 |
| DRB1*14:54  | 0.05 | 0.05 |
| DRB1*15:01  | 0.72 | 0.21 |
| DRB1*15:02  | 0.03 | 0.06 |
| DRB1*15:04  | 0.00 | 0.00 |
| DRB1*16:02  | 0.00 | 0.04 |
| DRB3*01:01  | 0.02 | 0.11 |
| DRB3*02:02  | 0.70 | 0.26 |
| DRB3*03:01  | 0.09 | 0.18 |
| DRB5*01:01  | 0.73 | 0.25 |
| DRB5*01:02  | 0.03 | 0.03 |
| DRB5*01:03  | 0.00 | 0.01 |
| DRB5*01:08  | 0.00 | 0.01 |
| DRB5*02:02  | 0.00 | 0.01 |
| DRB5*02:03  | 0.00 | 0.00 |



Supplemental Table 3. Risk factors for assessing risk of  $\geq 50\%$  eGFR decline in patients with PLA2R2-related Membranous Nephropathy (n = 392).

| Models and Factors                                              | Univariate Cox regression |             |                      | Multivariate Cox regression |             |                      |
|-----------------------------------------------------------------|---------------------------|-------------|----------------------|-----------------------------|-------------|----------------------|
|                                                                 | HR                        | 95% CI      | <i>P</i> value       | HR                          | 95% CI      | <i>P</i> value       |
| Any HLA risk allele possession #                                | 4.6                       | 2.6 - 8.2   | $2.9 \times 10^{-7}$ | 4.5                         | 2.4 - 8.3   | $1.6 \times 10^{-6}$ |
| Sex (Female)                                                    | 0.46                      | 0.24 - 0.90 | 0.02                 | 0.61                        | 0.30 - 1.2  | 0.17                 |
| Age at baseline (For every 10 yrs)                              | 1.2                       | 0.98 - 1.4  | 0.08                 | 0.95                        | 0.75 - 1.2  | 0.68                 |
| Proteinuria at baseline (g/24h)                                 | 1.2                       | 1.1 - 1.4   | < 0.001              | 1.1                         | 0.99 - 1.3  | 0.07                 |
| Albumin at baseline (g/l)                                       | 0.93                      | 0.88 - 0.98 | 0.008                | 0.99                        | 0.93 - 1.06 | 0.74                 |
| eGFR at baseline (For every 10 ml/min per 1.73 m <sup>2</sup> ) | 0.80                      | 0.73 - 0.89 | < 0.001              | 0.84                        | 0.73 - 0.96 | 0.01                 |
| anti-PLA2R antibodies (For every 10 U/ml)                       | 1.02                      | 1.01 - 1.03 | < 0.001              | 1.02                        | 1.01 - 1.03 | 0.002                |

# HLA risk alleles: DRB1\*13:01, DQB1\*06:03, DRB1\*04:05 or DQB1\*03:02. HR, hazard ratio; CI, confidence interval; eGFR, estimated glomerular filtration rate.

Supplemental Table 4. Relationship between the susceptible alleles and the four identified progressive risk alleles.

| Alleles             | Total<br>(n = 392) | DRB1*15:01+<br>(n=283) | DRB3*0202+<br>(n= 274) | DRB1*0301+<br>(n= 135) |
|---------------------|--------------------|------------------------|------------------------|------------------------|
| DRB1*13:01+         | 12                 | 4 (33.3%)              | 12 (100%)              | 0 (0%)                 |
| DQB1*06:03+         | 12                 | 4 (33.3%)              | 12 (100%)              | 0 (0%)                 |
| DRB1*04:05+         | 12                 | 4 (33.3%)              | 8 (66.7%)              | 5 (41.7%)              |
| DQB1*03:02+         | 21                 | 12 (57.1%)             | 8 (38.1%)              | 4 (19.0%)              |
| Any risk HLA allele | 44                 | 20 (45.5%)             | 27(61.4%)              | 8 (18.2%)              |

Supplemental Figure 1. Kaplan–Meier analysis of kidney survival curves ( $\geq 50\%$  decline in eGFR) in PLA2R-related membranous nephropathy patients. HLA risk alleles: DRB1\*13:01, DQB1\*06:03, DRB1\*04:05 or DQB1\*03:02.

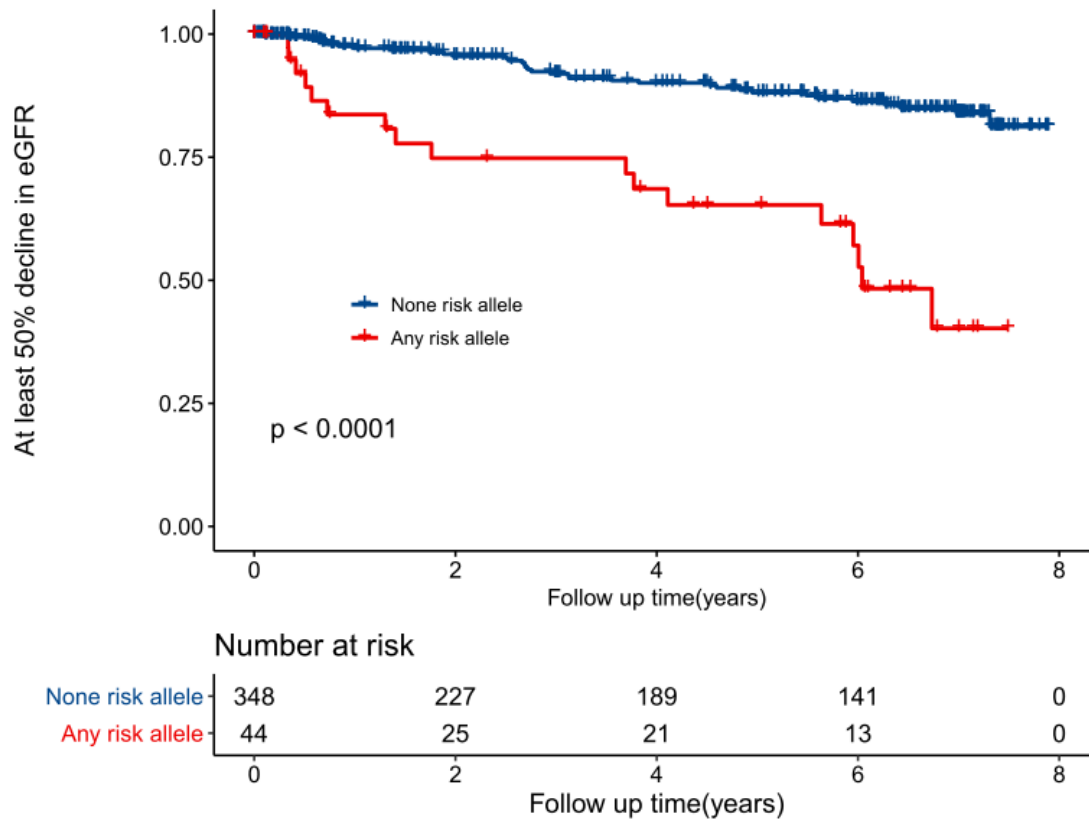

Supplemental Figure 2. Kaplan–Meier analysis of kidney survival curves ( $\geq 40\%$  decline in eGFR) in PLA2R-related membranous nephropathy patients. (A) Patients with positive HLA DRB1\*13:01 had worse kidney outcome than those with negative HLA DRB1\*13:01 during follow-up. (B) Patients with DRB1\*13:01<sup>+</sup>DRB3\*02:02<sup>+</sup> had a significant higher rate of kidney failure than those with DRB1\*13:01<sup>-</sup>DRB3\*02:02<sup>+</sup>.

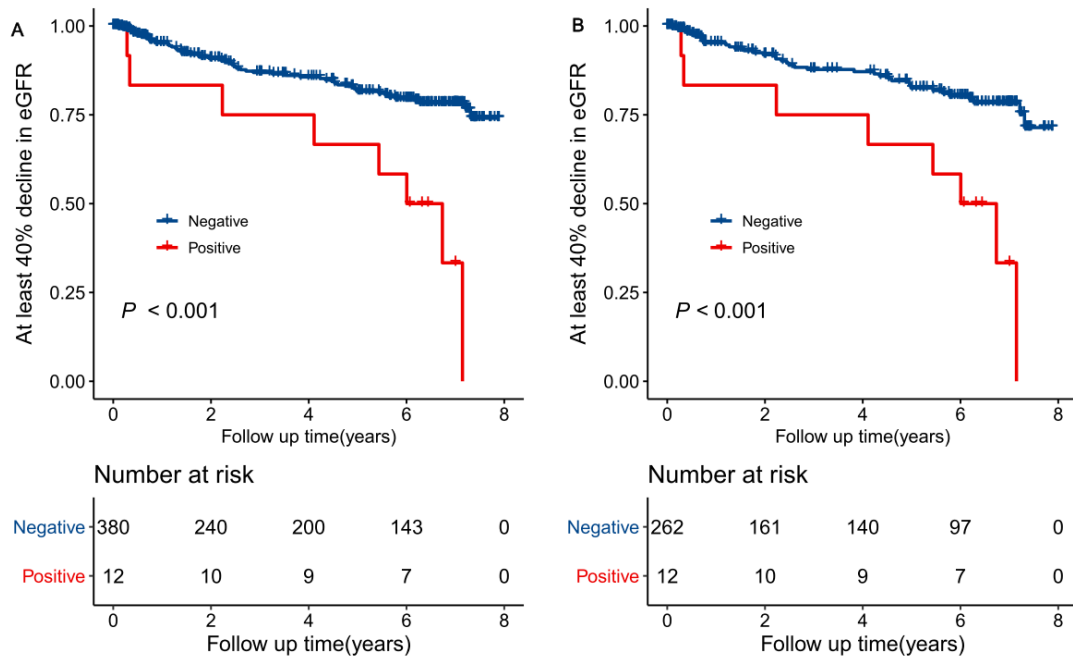

Supplemental Figure 3. Kaplan–Meier analysis of kidney survival curves ( $\geq 40\%$  decline in eGFR) in PLA2R-related membranous nephropathy patients. Patients with positive HLA DRB1\*04:05 had worse kidney outcomes during follow-up. eGFR, estimated glomerular filtration.

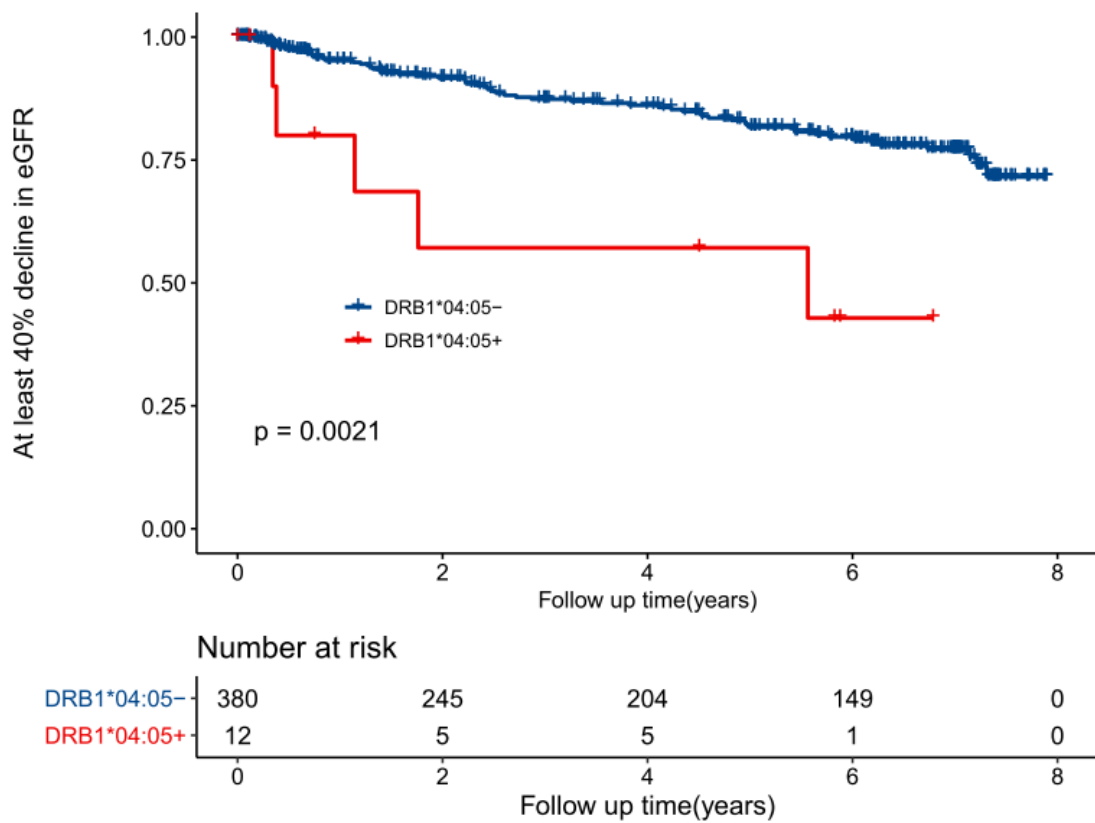

Supplemental Figure 4. Kaplan–Meier analysis of kidney survival curves ( $\geq 40\%$  decline in eGFR) in PLA2R-related membranous nephropathy patients. Patients with positive HLA DQB1\*03:02 had worse kidney outcomes during follow-up. eGFR, estimated glomerular filtration.

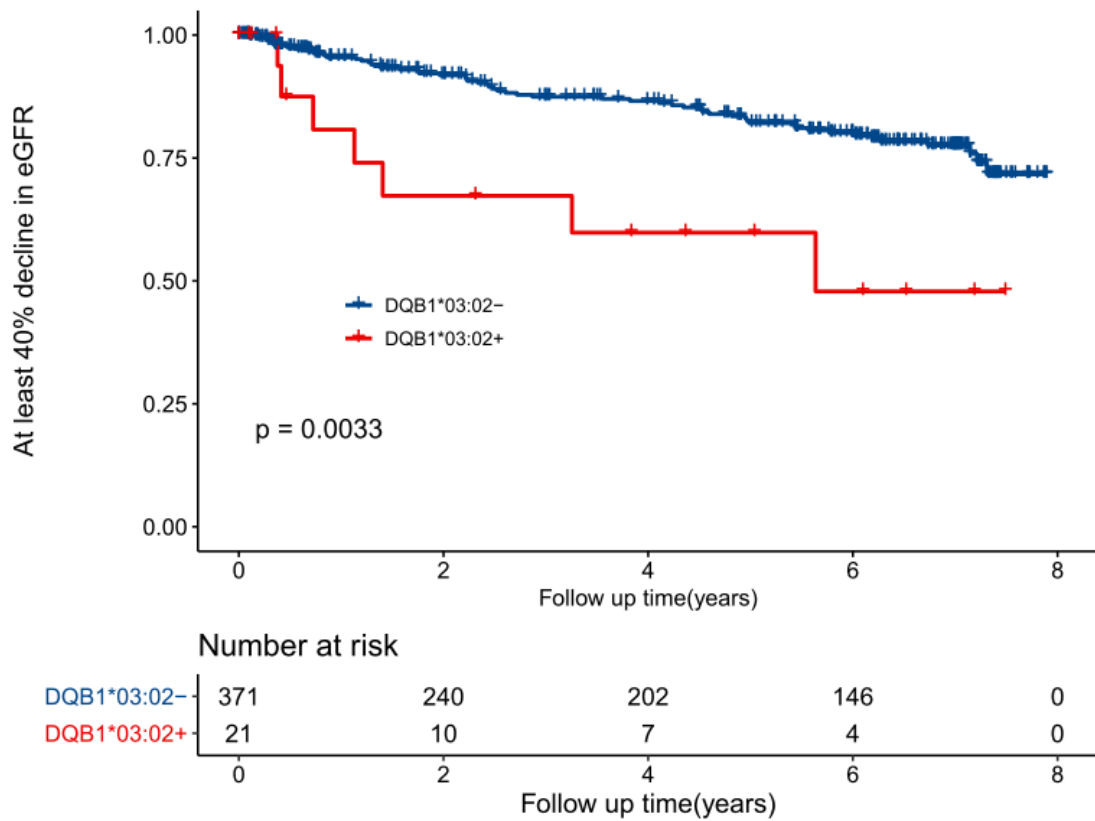

Supplemental Figure 5. Linkage map of HLA-DRB3/4/5 with HLA-DRB1 in the National Marrow Donor Program (NMDP) of Chinese population.

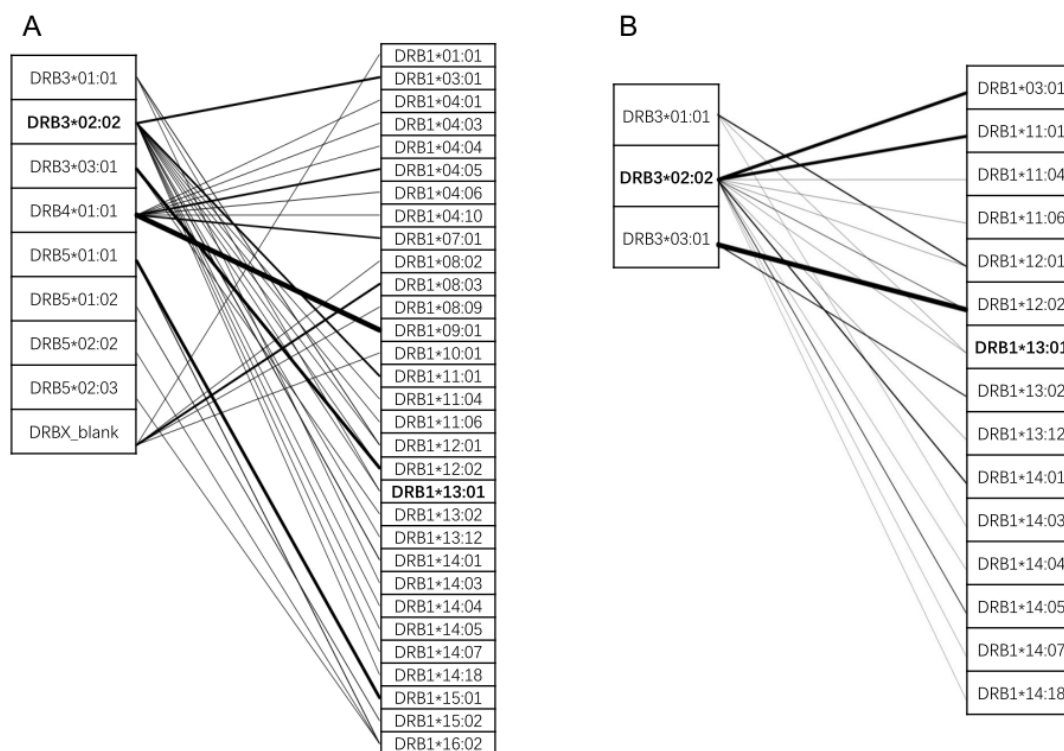

The line width represents the frequency of each haplotype. Panel A shows the linkage of HLA-DRB3/4/5 with HLA-DRB1; Panel B shows the linkage of HLA-DRB3 with HLA-DRB1. HLA DRB1\*13:01 allele was mostly lined with DRB3\*02:02 and DRB3\*0101 in general Chinese population. DRB3\*02:02 allele was linked with a number of DRB1 alleles, while DRB1\*03:01 allele was almost completely linked with DRB3\*02:02. Data were collected from Hum Immunol, 74: 1313-1320, 2013 10.1016.
